# Supplementary material
Source: PubMed Central journal article supplement (PMC3864002)
Supplement: NIHMS497027-supplement-01.pdf [file NIHMS497027-supplement-01.pdf]

**Supplemental Table. Association of SNPs with anthropomorphic characteristics\*.**

\* Age-, sex-, and lipid lowering use-adjusted mean and standard error are presented for each genotype group.

**Supplemental Table. Association of SNPs with anthropomorphic characteristics\*.**

| SNP                            | rs780094     |             |             | rs2228603    |             | rs1213785      |             |            | rs4240624      |              | rs738409      |             |             |
|--------------------------------|--------------|-------------|-------------|--------------|-------------|----------------|-------------|------------|----------------|--------------|---------------|-------------|-------------|
| Effect allele                  | T            |             |             | T            |             | C              |             |            | A              |              | G             |             |             |
| Other allele                   | C            |             |             | C            |             | T              |             |            | G              |              | C             |             |             |
| Effect allele Frequency        | 40.9         |             |             | 7.4          |             | 73.5           |             |            | 8.3            |              | 22.0          |             |             |
| Nearest gene                   | <i>GCKR</i>  |             |             | <i>NCAN</i>  |             | <i>LYPLAL1</i> |             |            | <i>PPP1R3B</i> |              | <i>PNPLA3</i> |             |             |
| Genotypes                      | TT<br>N=186  | CT<br>N=522 | CC<br>N=384 | - T<br>N=155 | CC<br>N=928 | CC<br>N=696    | CT<br>N=325 | TT<br>N=39 | AA<br>N=883    | - G<br>N=172 | GG<br>N=54    | GC<br>N=370 | CC<br>N=664 |
| Weight (mean)                  | 136          | 139         | 141         | 140          | 139         | 139            | 141         | 135        | 139            | 138          | 140           | 140         | 139         |
| SE                             | 1.9          | 1.3         | 1.5         | 2.3          | 0.9         | 1.1            | 1.7         | 4.5        | 1.0            | 2.0          | 3.9           | 1.4         | 1.1         |
| p-value                        | <b>0.001</b> |             |             | 0.85         |             | 0.64           |             |            | 0.64           |              | 0.59          |             |             |
| Height, cm (mean)              | 167          | 167         | 166         | 166          | 167         | 167            | 166         | 166        | 166            | 166          | 167           | 166         | 167         |
| SE                             | 0.7          | 0.4         | 0.4         | 0.7          | 0.3         | 0.3            | 0.5         | 1.1        | 0.3            | 0.6          | 1.2           | 0.5         | 0.3         |
| p-value                        | 0.86         |             |             | 0.41         |             | <b>0.05</b>    |             |            | 0.91           |              | 0.67          |             |             |
| BMI, kg/m <sup>2</sup> (mean)  | 48.8         | 49.8        | 51.2        | 50.6         | 50.1        | 49.9           | 50.6        | 48.8       | 50.1           | 49.8         | 50.6          | 50.5        | 49.9        |
| SE                             | 0.6          | 0.4         | 0.5         | 0.7          | 0.3         | 0.3            | 0.5         | 1.4        | 0.3            | 0.6          | 1.3           | 0.5         | 0.3         |
| p-value                        | <b>0.001</b> |             |             | 0.56         |             | 0.72           |             |            | 0.65           |              | 0.37          |             |             |
| Waist circumference, cm (mean) | 53.2         | 53.7        | 54.0        | 54.8         | 53.5        | 53.6           | 53.9        | 53.7       | 54.0           | 53.5         | 53.4          | 54.0        | 53.5        |
| SE                             | 0.5          | 0.3         | 0.4         | 0.6          | 0.2         | 0.3            | 0.4         | 1.3        | 0.5            | 0.2          | 1.0           | 0.3         | 0.3         |
| p-value                        | <b>0.02</b>  |             |             | <b>0.03</b>  |             | 0.99           |             |            | 0.30           |              | 0.78          |             |             |

\* Age-, sex-, and lipid lowering medication-adjusted mean and standard error are presented for each genotype group.
